# Supplementary material for: Phosphorylation of a splice variant of collapsin response mediator protein 2 in the nucleus of tumour cells links cyclin dependent kinase-5 to oncogenesis
Source: Springer Nature journal article supplement (doi:10.1186/s12885-015-1691-1), 2015-11-10

# Supp Fig.1A

GST-tau

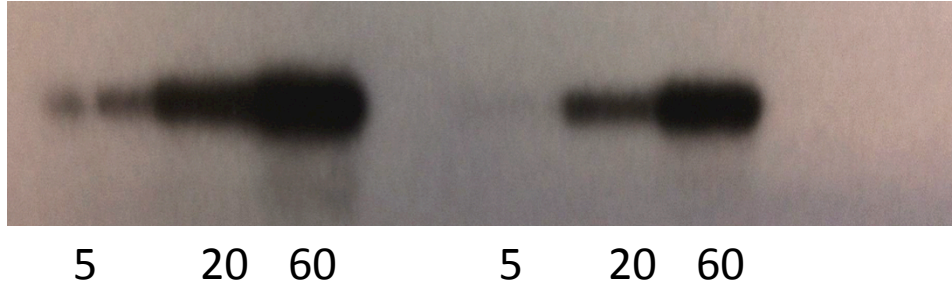

p35/Cdk5

p25/Cdk5

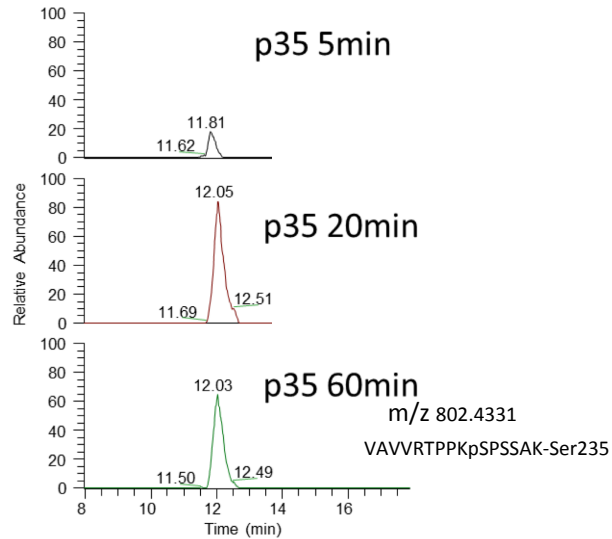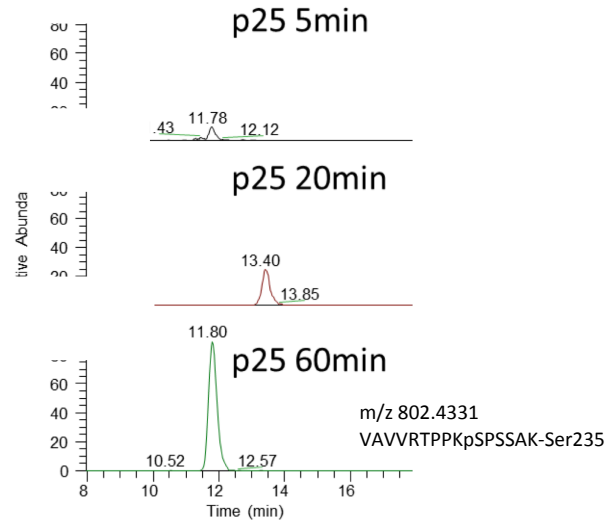

# Supp Fig.1B

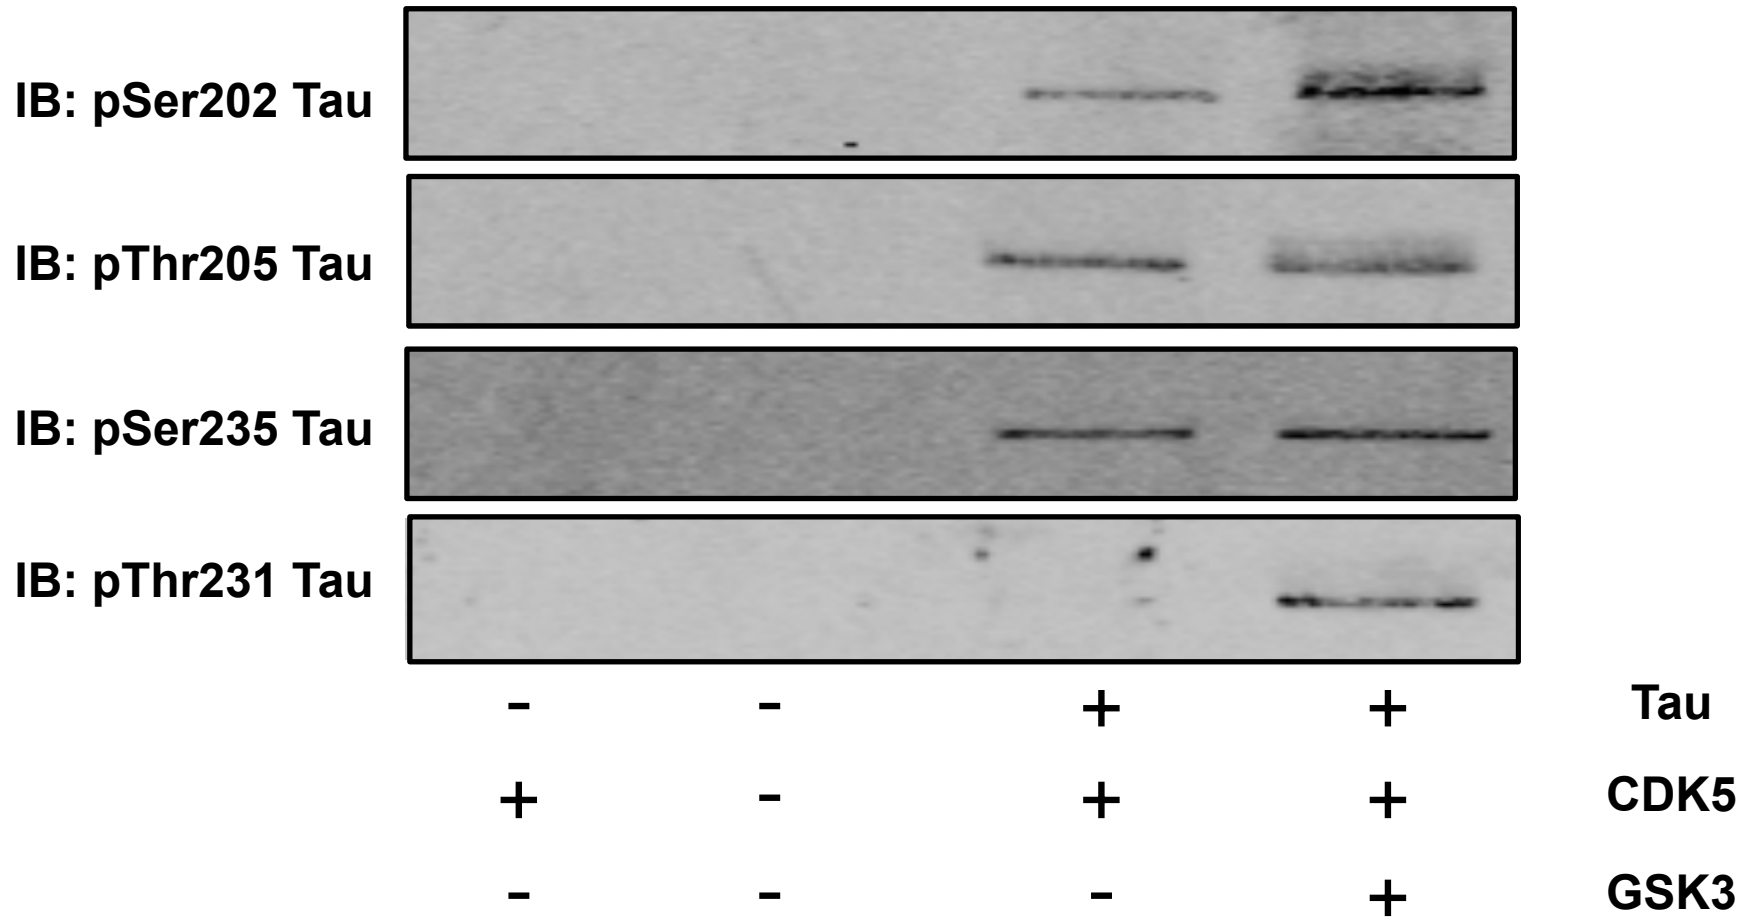

# Supp Fig.2

## A

IB: FLAG

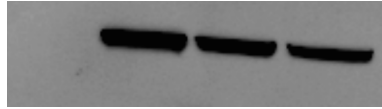

IB: pCRMP2 S522

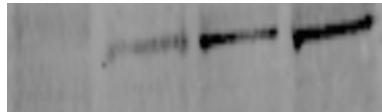

IB: Cdk5

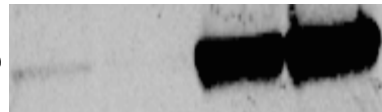

IB: p35/p25

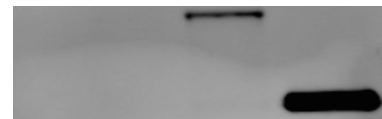

Untransfected

CRMP2

CRMP2 + p35/Cdk5

CRMP2 + p25/Cdk5

## B

pCRMP2 S522/total CRMP2

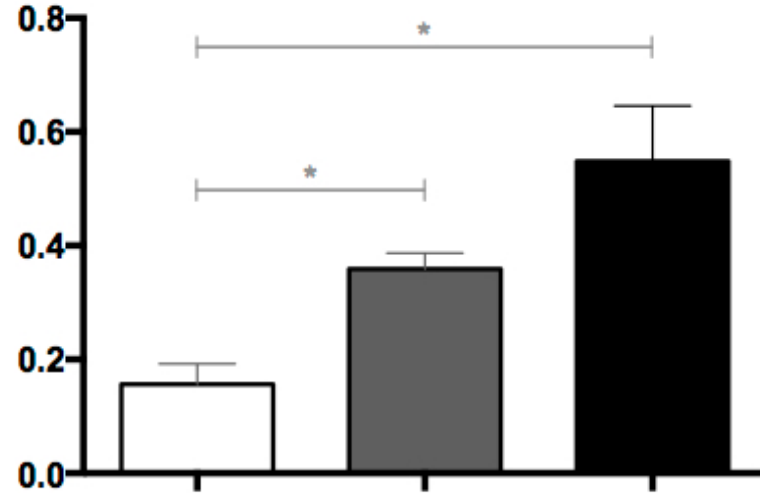

CRMP2

CRMP2 + p35/Cdk5

CRMP2 + p25/Cdk5

# Supp Fig.2

**C**

IB: FLAG

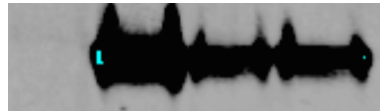

IB: pCRMP4 S522

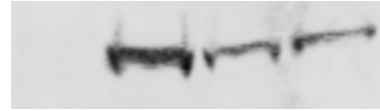

IB: Cdk5

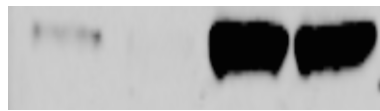

IB: p35/p25

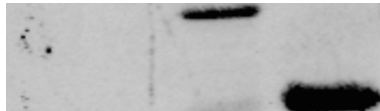

Untransfected  
CRMP4  
CRMP4 + p35/Cdk5  
CRMP4 + p25/Cdk5

**D**

pCRMP4 S522/total CRMP2

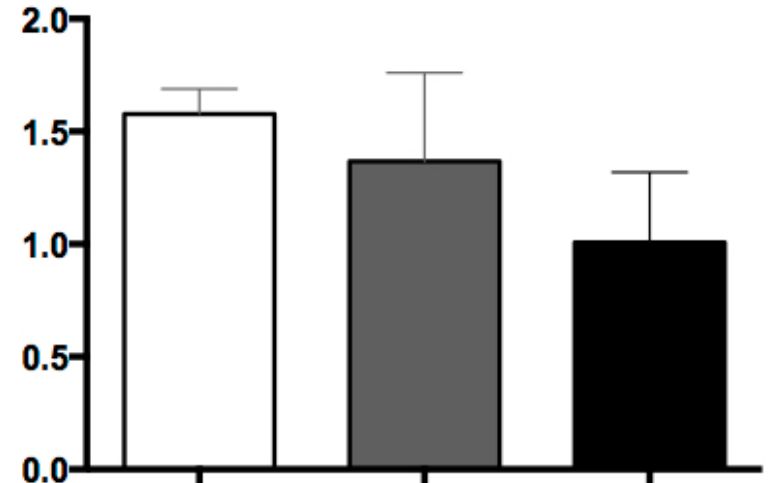

CRMP4  
CRMP4 + p35/Cdk5  
CRMP4 + p25/Cdk5

# Supp Fig.3

## A

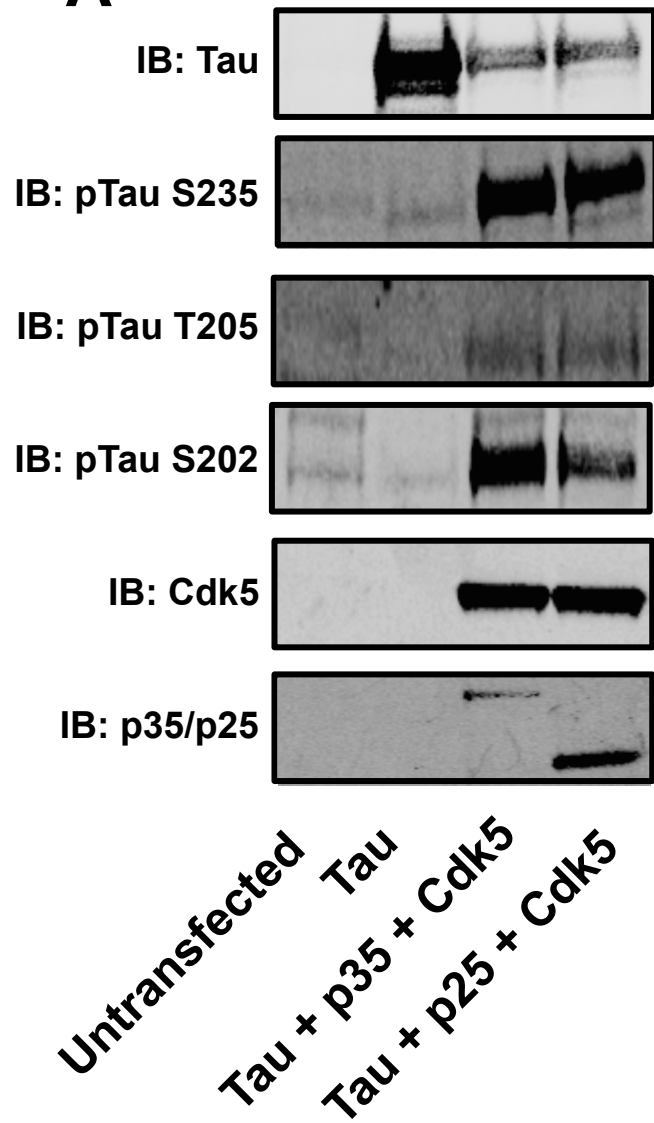

## B

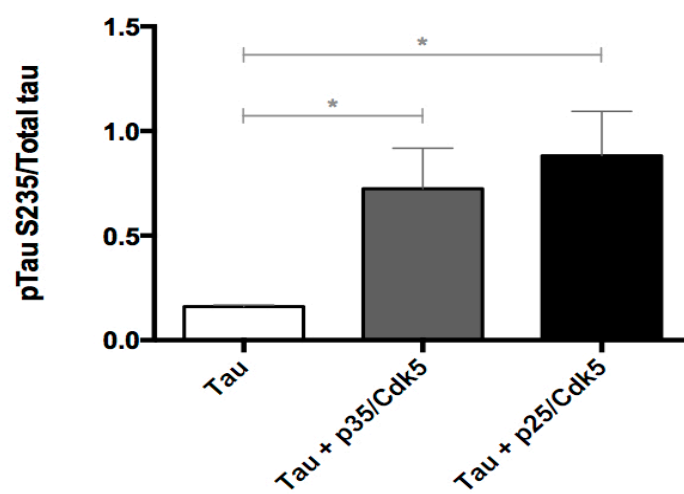

## C

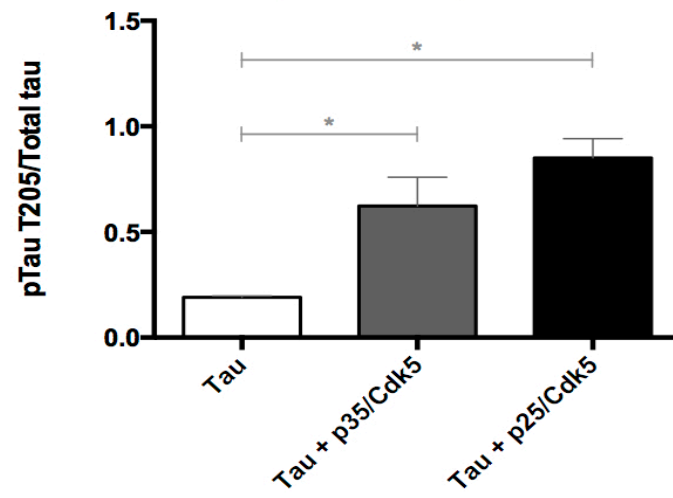

## D

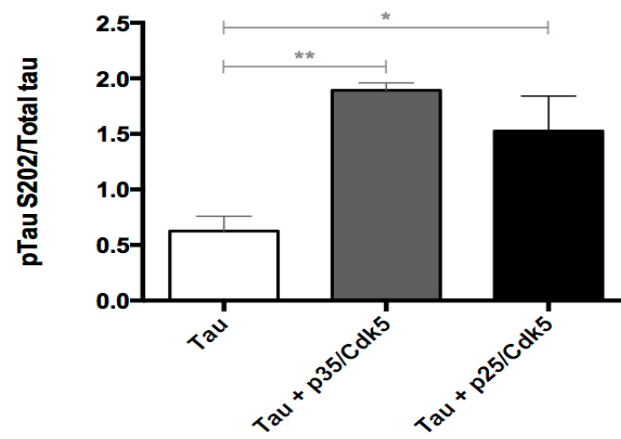

Supplement: MOESM2 [file 9745162]
